# Supplementary material
Source: Springer Nature journal article supplement (https://www.springermedizin.de/resource/supplementary/12889_2012_5110_MOESM4_ESM.pdf/9496600)

**(a) Cost per case detected**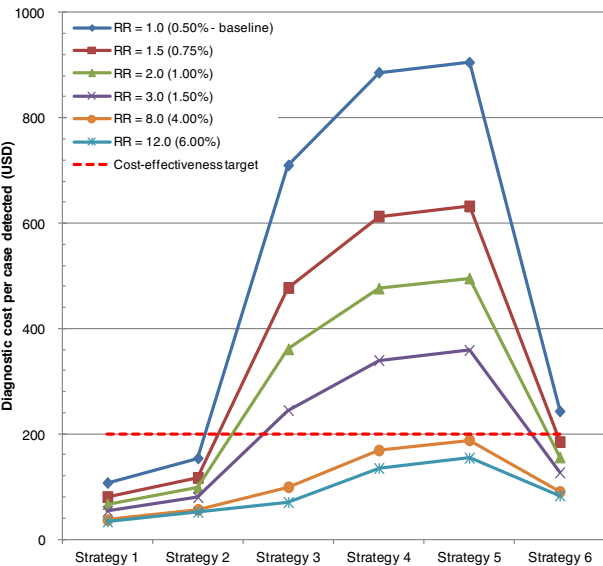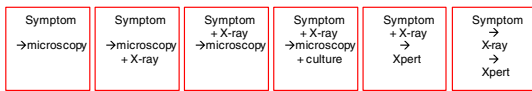**(b) Number Needed to Screen (NNS)**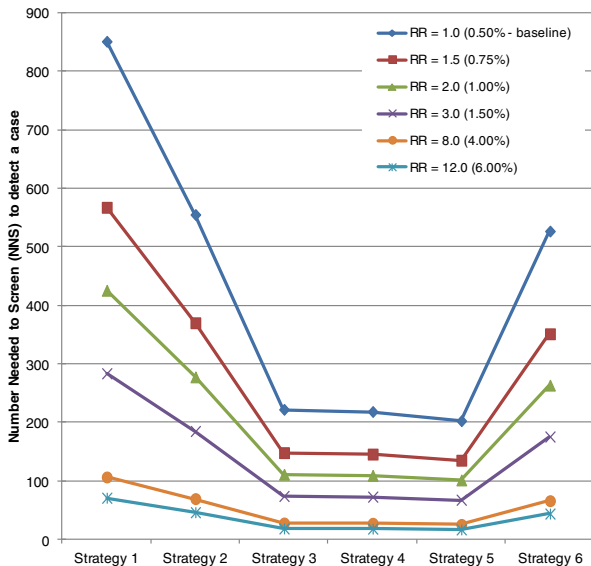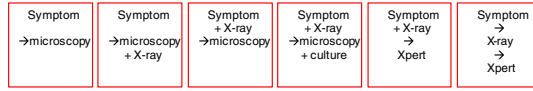

Supplement: MOESM4 [file 9496600]
